# Supplementary material for: Inter-residue distances derived from fold contact propensities correlate with evolutionary substitution costs
Source: Springer Nature journal article supplement (doi:10.1186/1471-2105-5-153), 2004-10-18
Supplement: 12859_2004_269_MOESM1_ESM.pdf [file 12859_2004_269_MOESM1_ESM.pdf]

|   | A           | C           | D           | E           | F           | G           | H           | I           | K           | L           | M           | N           | P           | Q           | R           | S           | T           | V           | W           | Y           |
|---|-------------|-------------|-------------|-------------|-------------|-------------|-------------|-------------|-------------|-------------|-------------|-------------|-------------|-------------|-------------|-------------|-------------|-------------|-------------|-------------|
| A | <b>0.50</b> | 2.31        | 0.59        | 0.52        | 1.61        | 0.46        | 0.68        | 1.16        | 0.45        | 1.13        | 0.99        | 0.42        | 0.29        | 0.30        | 0.60        | 0.35        | 0.27        | 0.86        | 1.74        | 1.22        |
| C | <b>0.79</b> | <b>8.20</b> | 2.53        | 2.51        | 2.02        | 2.54        | 2.06        | 2.07        | 2.48        | 2.03        | 1.99        | 2.42        | 2.27        | 2.35        | 2.28        | 2.41        | 2.29        | 2.04        | 2.00        | 1.97        |
| D | <b>0.28</b> | <b>0.45</b> | <b>0.29</b> | 0.11        | 2.01        | 0.40        | 0.80        | 1.61        | 0.45        | 1.59        | 1.41        | 0.29        | 0.48        | 0.37        | 0.73        | 0.33        | 0.46        | 1.33        | 2.06        | 1.51        |
| E | <b>0.29</b> | <b>0.40</b> | <b>0.24</b> | <b>0.25</b> | 1.95        | 0.38        | 0.78        | 1.54        | 0.44        | 1.51        | 1.34        | 0.27        | 0.42        | 0.32        | 0.70        | 0.29        | 0.41        | 1.25        | 2.00        | 1.45        |
| F | <b>1.28</b> | <b>2.16</b> | <b>0.51</b> | <b>0.61</b> | <b>3.67</b> | 2.04        | 1.40        | 0.54        | 1.94        | 0.52        | 0.63        | 1.86        | 1.64        | 1.73        | 1.55        | 1.85        | 1.63        | 0.79        | 0.43        | 0.67        |
| G | <b>0.26</b> | <b>0.45</b> | <b>0.32</b> | <b>0.23</b> | <b>0.65</b> | <b>0.19</b> | 0.91        | 1.61        | 0.31        | 1.58        | 1.42        | 0.32        | 0.46        | 0.37        | 0.78        | 0.25        | 0.46        | 1.31        | 2.14        | 1.60        |
| H | <b>0.57</b> | <b>1.48</b> | <b>1.06</b> | <b>0.89</b> | <b>1.38</b> | <b>0.41</b> | <b>1.93</b> | 1.10        | 0.75        | 1.06        | 0.86        | 0.65        | 0.53        | 0.58        | 0.38        | 0.67        | 0.52        | 0.86        | 1.39        | 0.85        |
| I | <b>1.13</b> | <b>1.56</b> | <b>0.39</b> | <b>0.53</b> | <b>2.78</b> | <b>0.43</b> | <b>0.97</b> | <b>2.83</b> | 1.51        | 0.09        | 0.34        | 1.46        | 1.25        | 1.33        | 1.20        | 1.44        | 1.22        | 0.31        | 0.81        | 0.62        |
| K | <b>0.31</b> | <b>0.52</b> | <b>0.86</b> | <b>0.91</b> | <b>0.70</b> | <b>0.26</b> | <b>0.53</b> | <b>0.56</b> | <b>0.28</b> | 1.49        | 1.32        | 0.26        | 0.39        | 0.30        | 0.53        | 0.23        | 0.38        | 1.22        | 2.00        | 1.46        |
| L | <b>1.07</b> | <b>1.65</b> | <b>0.38</b> | <b>0.48</b> | <b>2.86</b> | <b>0.43</b> | <b>0.99</b> | <b>2.64</b> | <b>0.56</b> | <b>2.59</b> | 0.27        | 1.43        | 1.21        | 1.30        | 1.18        | 1.41        | 1.19        | 0.29        | 0.80        | 0.59        |
| M | <b>0.98</b> | <b>1.59</b> | <b>0.41</b> | <b>0.52</b> | <b>2.73</b> | <b>0.57</b> | <b>1.12</b> | <b>2.12</b> | <b>0.57</b> | <b>2.10</b> | <b>2.06</b> | 1.24        | 1.02        | 1.12        | 0.98        | 1.24        | 1.02        | 0.28        | 0.80        | 0.46        |
| N | <b>0.36</b> | <b>0.61</b> | <b>0.58</b> | <b>0.48</b> | <b>0.78</b> | <b>0.39</b> | <b>0.82</b> | <b>0.51</b> | <b>0.54</b> | <b>0.56</b> | <b>0.67</b> | <b>0.73</b> | 0.29        | 0.14        | 0.52        | 0.12        | 0.25        | 1.16        | 1.91        | 1.36        |
| P | <b>0.41</b> | <b>0.90</b> | <b>0.37</b> | <b>0.44</b> | <b>1.07</b> | <b>0.33</b> | <b>0.79</b> | <b>0.76</b> | <b>0.36</b> | <b>0.72</b> | <b>0.84</b> | <b>0.56</b> | <b>0.53</b> | 0.19        | 0.46        | 0.28        | 0.23        | 0.96        | 1.72        | 1.18        |
| Q | <b>0.40</b> | <b>0.73</b> | <b>0.48</b> | <b>0.45</b> | <b>0.91</b> | <b>0.37</b> | <b>0.75</b> | <b>0.71</b> | <b>0.55</b> | <b>0.72</b> | <b>0.84</b> | <b>0.61</b> | <b>0.56</b> | <b>0.63</b> | 0.47        | 0.15        | 0.14        | 1.03        | 1.80        | 1.25        |
| R | <b>0.50</b> | <b>0.87</b> | <b>1.37</b> | <b>1.34</b> | <b>1.22</b> | <b>0.50</b> | <b>1.02</b> | <b>0.93</b> | <b>0.48</b> | <b>0.92</b> | <b>0.89</b> | <b>0.85</b> | <b>0.79</b> | <b>0.81</b> | <b>0.86</b> | 0.56        | 0.44        | 0.95        | 1.55        | 1.01        |
| S | <b>0.36</b> | <b>0.66</b> | <b>0.48</b> | <b>0.45</b> | <b>0.86</b> | <b>0.31</b> | <b>0.80</b> | <b>0.59</b> | <b>0.41</b> | <b>0.60</b> | <b>0.62</b> | <b>0.54</b> | <b>0.43</b> | <b>0.56</b> | <b>0.71</b> | <b>0.49</b> | 0.24        | 1.14        | 1.93        | 1.38        |
| T | <b>0.51</b> | <b>0.84</b> | <b>0.47</b> | <b>0.53</b> | <b>1.12</b> | <b>0.37</b> | <b>0.89</b> | <b>0.94</b> | <b>0.54</b> | <b>0.88</b> | <b>0.88</b> | <b>0.68</b> | <b>0.57</b> | <b>0.67</b> | <b>0.84</b> | <b>0.57</b> | <b>0.73</b> | 0.93        | 1.71        | 1.16        |
| V | <b>0.99</b> | <b>1.46</b> | <b>0.37</b> | <b>0.45</b> | <b>2.48</b> | <b>0.40</b> | <b>0.91</b> | <b>2.29</b> | <b>0.48</b> | <b>2.17</b> | <b>1.71</b> | <b>0.49</b> | <b>0.68</b> | <b>0.65</b> | <b>0.78</b> | <b>0.56</b> | <b>0.85</b> | <b>2.08</b> | 1.00        | 0.64        |
| W | <b>1.29</b> | <b>2.38</b> | <b>0.92</b> | <b>1.06</b> | <b>3.44</b> | <b>0.87</b> | <b>1.86</b> | <b>2.58</b> | <b>1.02</b> | <b>2.68</b> | <b>2.72</b> | <b>1.13</b> | <b>1.66</b> | <b>1.31</b> | <b>1.75</b> | <b>1.12</b> | <b>1.28</b> | <b>2.24</b> | <b>3.48</b> | 0.58        |
| Y | <b>1.10</b> | <b>1.83</b> | <b>1.00</b> | <b>1.03</b> | <b>2.54</b> | <b>0.72</b> | <b>1.64</b> | <b>2.06</b> | <b>1.05</b> | <b>2.01</b> | <b>2.06</b> | <b>0.99</b> | <b>1.47</b> | <b>1.11</b> | <b>1.58</b> | <b>0.87</b> | <b>1.01</b> | <b>1.73</b> | <b>2.89</b> | <b>2.12</b> |

**Additional table 1:** In the bottom half and diagonal, in bold, we have the contact propensities  $P_{ij}$ , normalised to average unity, derived from a database of 1073 non-redundant protein structures with contact cut-off set at 4.5Å. The top half shows the corresponding inter-residue distances  $D_{ij} = \sqrt{\frac{1}{20} \sum_k (P_{ik} - P_{jk})^2}$ , again normalised to unity. The distance matrix is zero along the diagonal.
