# Supplementary material for: Inter-residue distances derived from fold contact propensities correlate with evolutionary substitution costs
Source: Springer Nature journal article supplement (doi:10.1186/1471-2105-5-153), 2004-10-18
Supplement: 12859_2004_269_MOESM2_ESM.pdf [file 12859_2004_269_MOESM2_ESM.pdf]

|   | Contact Propensity<br>$r = 0.9995$ |       | PAM250<br>$r = 0.9867$ |       | MJ<br>$r = 0.99995$ |       |
|---|------------------------------------|-------|------------------------|-------|---------------------|-------|
|   | X                                  | Y     | X                      | Y     | X                   | Y     |
| A | 0.47                               | 0.16  | -0.33                  | -0.23 | 0.05                | 0.25  |
| D | 0.77                               | -0.42 | -0.20                  | -0.67 | 0.76                | 0.45  |
| E | 0.72                               | -0.31 | -0.23                  | -0.57 | 0.76                | 0.44  |
| F | -1.31                              | 0.58  | 0.20                   | 1.24  | -1.05               | -1.16 |
| G | 0.93                               | -0.09 | -0.39                  | -0.51 | 0.37                | 0.38  |
| H | -0.04                              | -0.45 | 0.27                   | -0.39 | 0.07                | 0.19  |
| I | -0.77                              | 0.64  | -0.43                  | 0.50  | -0.87               | -0.91 |
| K | 0.73                               | -0.25 | 0.19                   | -0.47 | 0.58                | 0.98  |
| L | -0.75                              | 0.60  | -0.22                  | 0.79  | -1.06               | -1.16 |
| M | -0.64                              | 0.37  | -0.39                  | 0.50  | -0.64               | -0.63 |
| N | 0.62                               | -0.30 | 0.00                   | -0.41 | 0.54                | 0.52  |
| P | 0.44                               | -0.12 | -0.21                  | -0.52 | 0.35                | 0.44  |
| Q | 0.52                               | -0.18 | -0.05                  | -0.55 | 0.48                | 0.45  |
| R | 0.09                               | -0.49 | 0.56                   | -0.35 | 0.26                | 0.59  |
| S | 0.67                               | -0.19 | 0.02                   | -0.31 | 0.47                | 0.51  |
| T | 0.42                               | -0.12 | -0.26                  | -0.20 | 0.30                | 0.32  |
| V | -0.45                              | 0.51  | -0.51                  | 0.34  | -0.58               | -0.58 |
| W | -1.51                              | 0.14  | 1.60                   | 0.71  | -0.53               | -0.64 |
| Y | -0.91                              | -0.06 | 0.38                   | 1.10  | -0.28               | -0.43 |

**Additional table 2:** The components of the two-dimensional residue vectors. For the given statistic we generate an inter-residue distance matrix  $D_{ij}$  and the vectors  $\vec{v}_i$  are then defined such that they minimise  $|D_{ij}(P) - |\vec{v}_i - \vec{v}_j||$ . The distance matrix is invariant under translations and rotations of the vectors and we have taken the vector sum to be at the origin,  $\sum_i \vec{v}_i = \vec{0}$ . The correlation factors are between the distance matrix and its vector representation  $r(D_{ij}, |\vec{v}_i - \vec{v}_j|)$ .
